# Supplementary material for: Dysregulation of Leukocyte Trafficking in Type 2 Diabetes: Mechanisms and Potential Therapeutic Avenues
Source: Frontiers journal article supplement (doi:10.3389/fcell.2021.624184), 2021-02-22
Supplement: Table_1.DOCX [file Table_1.DOCX]

|  | **Effect of obesity/T2DM on cell recruitment** | **Potential mechanisms** | **Reference** |
| --- | --- | --- | --- |
| **Monocyte/**  **macrophage** | recruitment of macrophages in retinas of STZ-induced diabetic rats  recruitment of macrophages in kidney of STZ-induced diabetic mice  adhesion of monocyte to adipocytes in the subcutaneous adipose tissue of patients with T2DM and obesity **(Human study)**  recruitment of macrophages in white adipose tissue of HFD-induced obese mice   levels of F4/80 and CD11c mRNA expression in adipose tissue of HFD fed mice  expression of F4/80 in adipose tissue of HFD fed mice  RPMs in db/db mice  Increased M2 polarization  *In vitro*  adhesion and phagocytosis capacity of RPMs from in db/db mice  monocyte/macrophages in lung tissue of diabetic DPP4H/M mice following infection by *MERS-CoV* | CCL2-CCR2 axis  CCL2-CCR2 axis  CX3CL1 expression in adipose tissue  CCR5 expression in white adipose tissue  Adipose tissue expression of ICAM-1, VCAM-1, CCL2, CXCL14  Adipose tissue expression of mRNA for ICAM-1  Ongoing chronic inflammation in the peritoneal cavity in db/db mice  abnormal microenvironment in db/db mouse   lung tissue expression of Ccl2 and Cxcl10 | (Rangasamy et al., 2014)  (Tarabra et al., 2009)  (Shah et al., 2011)  (Kitade et al., 2012)  (Kawanishi et al., 2010)  (Brake et al., 2006)  (Liu et al., 2012)  (Liu et al., 2012)  (Kulcsar et al., 2019) |
| **DCs** | CD11chighF4/80low DCs in mice visceral adipose tissue in HFD-induced obese mice  CD11c+CD1c+ cDCs  in obese human subcutaneous adipose tissue  **(Human study)**  CD11c+ cDCs numbers in the adipose tissue of HFD-fed mice | Not described  Not described  Not described | (Bertola et al., 2012).  (Bertola et al., 2012).  (Chen et al., 2014) |
| **Neutrophils** |  trafficking of neutrophil into mice visceral adipose tissue after 3 days on HFD  recruitment of neutrophils into the adipose tissue of HFD-fed mice after 3 days on HFD (sustained infiltration for up to 90 days on HFD) | CD11b surface expression on neutrophils  expression and activity of neutrophil-secreted elastase in the adipose tissue of HFD‐fed mice | (Elgazar-Carmon et al., 2008)  (Talukdar et al., 2012) |
| **CD8+ T-cells** | infiltrated CD8+ effector T-cells in visceral adipose tissue in HFD-fed mice  lower numbers of CD8+ T-cells in their brains in *db/db* mice following infection with *West Nile virus* | Activation of CD8+T cells by endogenous stimuli localized in the adipose tissue   expression of E-selectin and ICAM-1 in *db/db* brains | (Nishimura et al., 2009).  (Kumar et al., 2014) |
| **CD4+ T-cells** |  CD4+ T-cells in lung tissue of diabetic DPP4H/M mice following infection by *MERS-CoV* |  lung tissue expression of Ccl2 and Cxcl10 | (Kulcsar et al., 2019) |
| **Tregs** |  regulatory T-cells in visceral adipose tissue of HFD-fed mice  CD4+ Tregs HFD-fed mice | Not described  levels of adiponectin in obese fat | (Nishimura et al., 2009).  (Feuerer et al., 2009; Ilan et al., 2010). |
| **B-cells** | number of B-cells in the bone marrow of HFD-fed mice  number of B-cells in the bone marrow of HFD-fed mice | Not described  lower expression of Pax5 in the bone marrow of HFD-fed mice | (Trottier et al., 2012)  (Chan et al., 2012) |
| **Granulocytes** | granulocytes in the alveolar airspace of stz-induced diabetic mice following infection by *Klebsiella pneumoniae* |  levels of (CXCL1, CXCL2) and (IL-1β, TNFα) in lung tissue | (Martinez et al., 2016) |
